# Supplementary material for: Rapid and highly-specific generation of targeted DNA sequencing libraries enabled by linking capture probes with universal primers
Source: PLoS One. 2018 Dec 5;13(12):e0208283. doi: 10.1371/journal.pone.0208283 (PMC6281261; doi:10.1371/journal.pone.0208283)
Supplement: S3 Table — (XLSX) [file pone.0208283.s003.xlsx]

## Sheet: Sheet1
Sample Type	Input Mass (ng)	Total Read Pairs	Chromosome	Gene	Position	Wildtype	Mutation Name	Muation Type	Mutant	Wildtype count*	Mutant count	Measured AF	Expected AF	GATK CNV Call
Mutant Rep 1	50	1999000	chr3	PIK3CA	179218303	G	E545K	SNV	A	455	13	0.0277778	0.056
Mutant Rep 1	50	1999000	chr7	EGFR	55174771	AGGAATTAAGAGAAGC	del_ELREA	deletion	A	911	42	0.0440714	0.053
Mutant Rep 1	50	1999000	chr7	EGFR	55181305	A	V769_D770insASV	Insertion	ATGGCCAGCG	1184	54	0.0436187	0.056
Mutant Rep 1	50	1999000	chr7	MET	116699793	GT	V237fs	deletion	G	2087	60	0.027946	0.025
Mutant Rep 1	50	1999000	chr12	KRAS	25245347	C	G13D	SNV	T	992	41	0.0396902	0.056
Mutant Rep 1	50	1999000	chr7	MET	MET			CNV					4.5	+
Mutant Rep 1	50	1999000	chr10	CCDC6/RET fusion	59878857/43114501			Fusion		30956	697	0.02202	0.05
Mutant Rep 2	50	2050000	chr3	PIK3CA	179218303	G	E545K	SNV	A	509	10	0.0192678	0.056
Mutant Rep 2	50	2050000	chr7	EGFR	55174771	AGGAATTAAGAGAAGC	del_ELREA	deletion	A	993	37	0.0359223	0.053
Mutant Rep 2	50	2050000	chr7	EGFR	55181305	A	V769_D770insASV	Insertion	ATGGCCAGCG	1295	60	0.0442804	0.056
Mutant Rep 2	50	2050000	chr7	MET	116699793	GT	V237fs	deletion	G	2293	69	0.0292125	0.025
Mutant Rep 2	50	2050000	chr12	KRAS	25245347	C	G13D	SNV	T	1144	32	0.0272109	0.056
Mutant Rep 2	50	2050000	chr7	MET	MET			CNV					4.5	+
Mutant Rep 2	50	2050000	chr10	CCDC6/RET fusion	59878857/43114501			Fusion		37888	903	0.0232786	0.05
1/10 Mut Rep 1	50	1935000	chr3	PIK3CA	179218303	G	E545K	SNV	A	1	0	0	0.0056
1/10 Mut Rep 1	50	1935000	chr7	EGFR	55174771	AGGAATTAAGAGAAGC	del_ELREA	deletion	A	1019	4	0.00391007	0.0053
1/10 Mut Rep 1	50	1935000	chr7	EGFR	55181305	A	V769_D770insASV	Insertion	ATGGCCAGCG	1905	11	0.00574113	0.0056
1/10 Mut Rep 1	50	1935000	chr7	MET	116699793	GT	V237fs	deletion	G	1	0	0	0.0025
1/10 Mut Rep 1	50	1935000	chr12	KRAS	25245347	C	G13D	SNV	T	719	4	0.0055325	0.0056
1/10 Mut Rep 1	50	1935000	chr7	MET	MET			CNV					1.35	0
1/10 Mut Rep 1	50	1935000	chr10	CCDC6/RET fusion	59878857/43114501			Fusion		34763	1	2.87654e-05	0.005
1/10 Mut Rep 2	50	1986000	chr3	PIK3CA	179218303	G	E545K	SNV	A	1	0	0	0.0056
1/10 Mut Rep 2	50	1986000	chr7	EGFR	55174771	AGGAATTAAGAGAAGC	del_ELREA	deletion	A	1057	3	0.00283019	0.0053
1/10 Mut Rep 2	50	1986000	chr7	EGFR	55181305	A	V769_D770insASV	Insertion	ATGGCCAGCG	1694	9	0.00528479	0.0056
1/10 Mut Rep 2	50	1986000	chr7	MET	116699793	GT	V237fs	deletion	G	1719	10	0.00578369	0.0025
1/10 Mut Rep 2	50	1986000	chr12	KRAS	25245347	C	G13D	SNV	T	667	2	0.00298954	0.0056
1/10 Mut Rep 2	50	1986000	chr7	MET	MET			CNV					1.35	0
1/10 Mut Rep 2	50	1986000	chr10	CCDC6/RET fusion	59878857/43114501			Fusion		38826	282	0.0072108	0.005
WildType Rep 1	50	2008000	chr3	PIK3CA	179218303	G	E545K	SNV	A	1	0	0	0
WildType Rep 1	50	2008000	chr7	EGFR	55174771	AGGAATTAAGAGAAGC	del_ELREA	deletion	A	1	0	0	0
WildType Rep 1	50	2008000	chr7	EGFR	55181305	A	V769_D770insASV	Insertion	ATGGCCAGCG	1	0	0	0
WildType Rep 1	50	2008000	chr7	MET	116699793	GT	V237fs	deletion	G	1	0	0	0
WildType Rep 1	50	2008000	chr12	KRAS	25245347	C	G13D	SNV	T	1	0	0	0
WildType Rep 1	50	2008000	chr7	MET	MET			CNV					0	0
WildType Rep 1	50	2008000	chr10	CCDC6/RET fusion	59878857/43114501			Fusion		36719	2	5.44647e-05	0
WildType Rep 2	50	1965000	chr3	PIK3CA	179218303	G	E545K	SNV	A	1	0	0	0
WildType Rep 2	50	1965000	chr7	EGFR	55174771	AGGAATTAAGAGAAGC	del_ELREA	deletion	A	1	0	0	0
WildType Rep 2	50	1965000	chr7	EGFR	55181305	A	V769_D770insASV	Insertion	ATGGCCAGCG	1	0	0	0
WildType Rep 2	50	1965000	chr7	MET	116699793	GT	V237fs	deletion	G	1	0	0	0
WildType Rep 2	50	1965000	chr12	KRAS	25245347	C	G13D	SNV	T	1	0	0	0
WildType Rep 2	50	1965000	chr7	MET	MET			CNV					0	0
WildType Rep 2	50	1965000	chr10	CCDC6/RET fusion	59878857/43114501			Fusion		35705	1	2.80065e-05	0
*Note: Wildtype count reported as 1 when no mutants detected
